# Supplementary material for: KOH self-templating synthesis of three-dimensional hierarchical porous carbon materials for high performance supercapacitors
Source: Royal Society of Chemistry journal article supplement (doi:10.1039/c4ta02167c), 2014-06-10
Supplement: c4ta02167c1.pdf [file c4ta02167c1.pdf]

1 **Supporting Information**

2 **KOH self-templating synthesis of three-dimensional hierarchical porous**  
3 **carbon materials for high performance supercapacitors**

4 Mingjie Li <sup>a,b,c,d,e</sup>, Chenming Liu<sup>\*a,c,d</sup>, Hongbin Cao <sup>\*a,c,d</sup>, He Zhao <sup>a,c,d</sup>, Yi Zhang  
5 <sup>a,b,c,d,e</sup>, Zhuangjun Fan <sup>\*f</sup>

6 <sup>a</sup> Key Laboratory of Green Process and Engineering, Institute of Process Engineering,  
7 Chinese Academy of Sciences, Beijing 100190, PR China

8 <sup>b</sup> School of Chemical Engineering & Technology, Tianjin University, Tianjin 300072,  
9 PR China

10 <sup>c</sup> National Engineering Laboratory for Hydrometallurgical Cleaner Production  
11 Technology, Beijing 100190, PR China

12 <sup>d</sup> Beijing Engineering Research Center of Process Pollution Control, Beijing 100190,  
13 PR China

14 <sup>e</sup> National Engineering Research Center of Distillation Technology, Tianjin  
15 University, Tianjin 300072, PR China

16 <sup>f</sup> Key Laboratory of Superlight Materials and Surface Technology, Ministry of  
17 Education, College of Material Science and Chemical Engineering, Harbin  
18 Engineering University, Harbin 150001, China

19  
20  
21

---

\*Corresponding authors: E-mail address: chmliu@ipe.ac.cn (Chenming Liu);  
hbcao@ipe.ac.cn (Hongbin Cao); fanzhj666@163.com (Zhuangjun Fan).

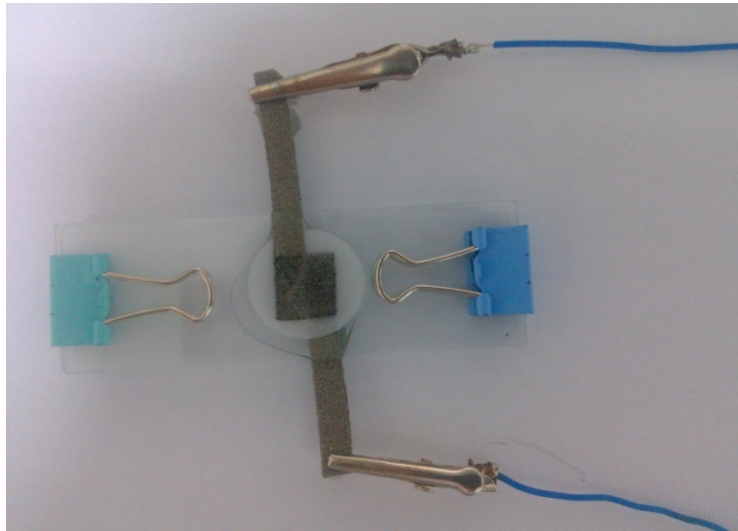

22

23

**Fig. S1 – Optical image of the setup used for the two-electrode test.**

24

25

The size distribution of macropores was also measured by a mercury porosimeter (AutoPore VI 9510, Micromeritics Co., USA). Mercury porosimetry (MP) technique is widely used to determine porosity and the pore size distribution (PSD) in porous materials because it can analyze pores even to the ones of several hundred micrometers. Here, macroporosity of the samples were evaluated by MP. PSDs extracted from MP experiments are shown in Fig. S1. RPC5 exhibits a broad peak from about 5 to 20  $\mu\text{m}$ , clearly highlighting the results observed by SEM. It is important to notice that a set of peaks can be observed having diameters from 0.1 to above 2  $\mu\text{m}$ . Such results certainly demonstrate a large array of macropores combined in the 3D architectures of RPC5. In PSD curve of RC, no distinct peaks are observed, which is in good harmony with SEM analysis.

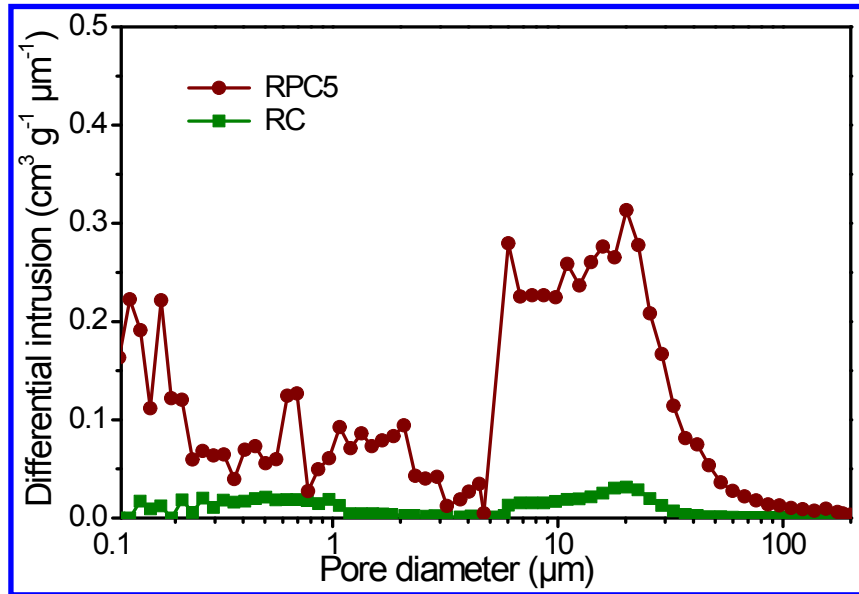

36  
37 **Fig. S2 – PSD of RPC5 and RC samples determined by mercury**  
38 **porosimetry.**  
39

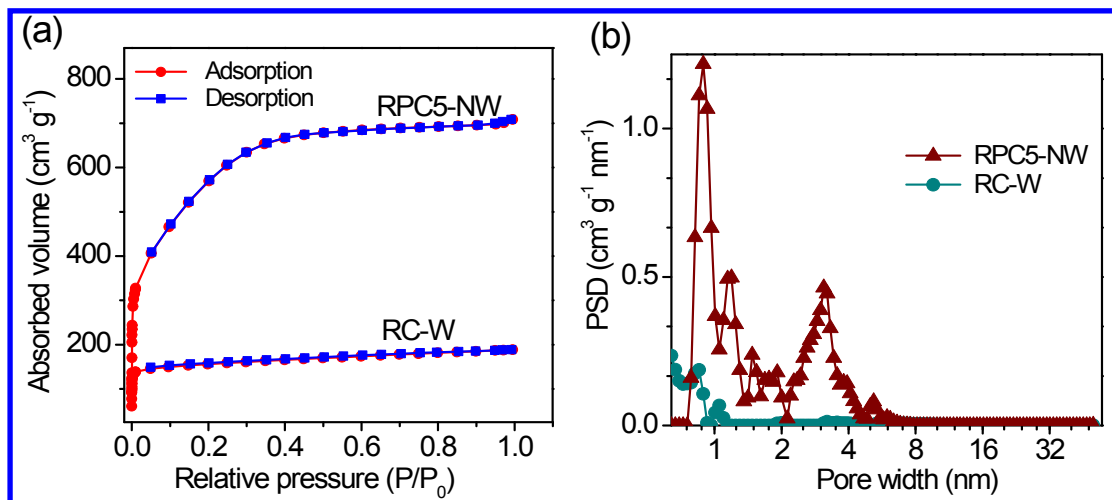

40  
41 **Fig. S3 – N<sub>2</sub> adsorption isotherms and PSD curves for RPC5-NW and RC-W.**

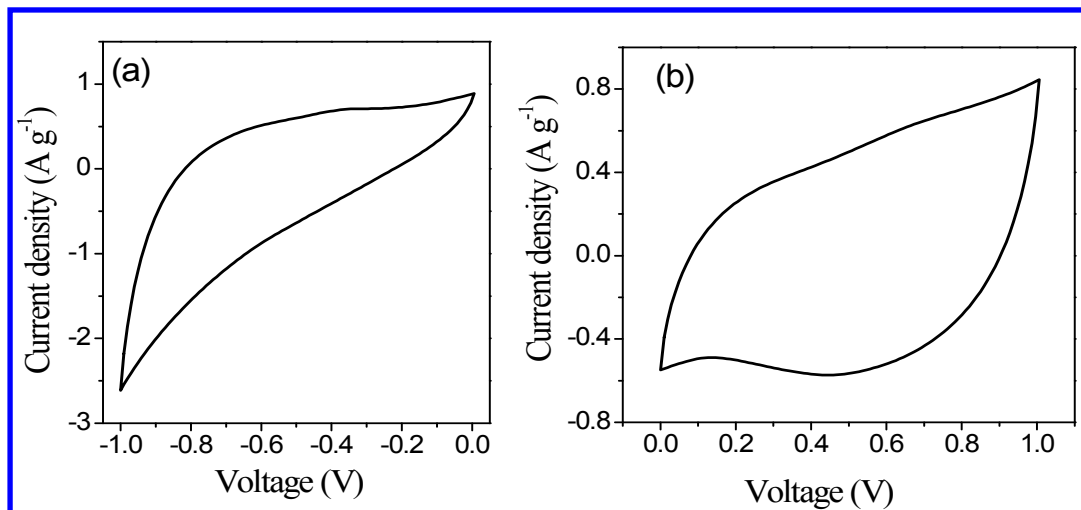

42

43 **Fig. S4 – (a) CV of RC electrode measured in a three-electrode system in 6 M**  
 44 **KOH within the potential range: –1.0 to 0 V ( Hg/HgO) at 50 mV s<sup>-1</sup>. (b) CV of**  
 45 **RC electrode measured in a two-electrode system in 6 M KOH within the**  
 46 **potential range: 0 to 1.0 V at 50 mV s<sup>-1</sup>.**

47

48

49 **Table S1 – The EIS fitting results of RPC5 electrode after different**  
 50 **charge/discharge cycles.**

| Cycles         | 1st      | 5000th   |
|----------------|----------|----------|
| $R_s$ (ohm)    | 0.455    | 0.237    |
| $R_{ct}$ (ohm) | 0.149    | 0.118    |
| $W$ (ohm)      | 0.430    | 0.435    |
| OCP1- $Y_0$    | 0.000579 | 0.000645 |
| OCP1- $n$      | 0.999    | 0.993    |
| OCP2- $Y_0$    | 0.0422   | 0.0415   |
| OCP2- $n$      | 0.998    | 0.981    |

51
